# Supplementary material
Source: Research Square preprint supplement (doi:10.21203/rs.3.rs-8765346/v1)

**Figure 1. Observed prevalence of orientation impairment**

By stroke history and educational attainment (Wilson 95% CI)

● No stroke ▲ Stroke

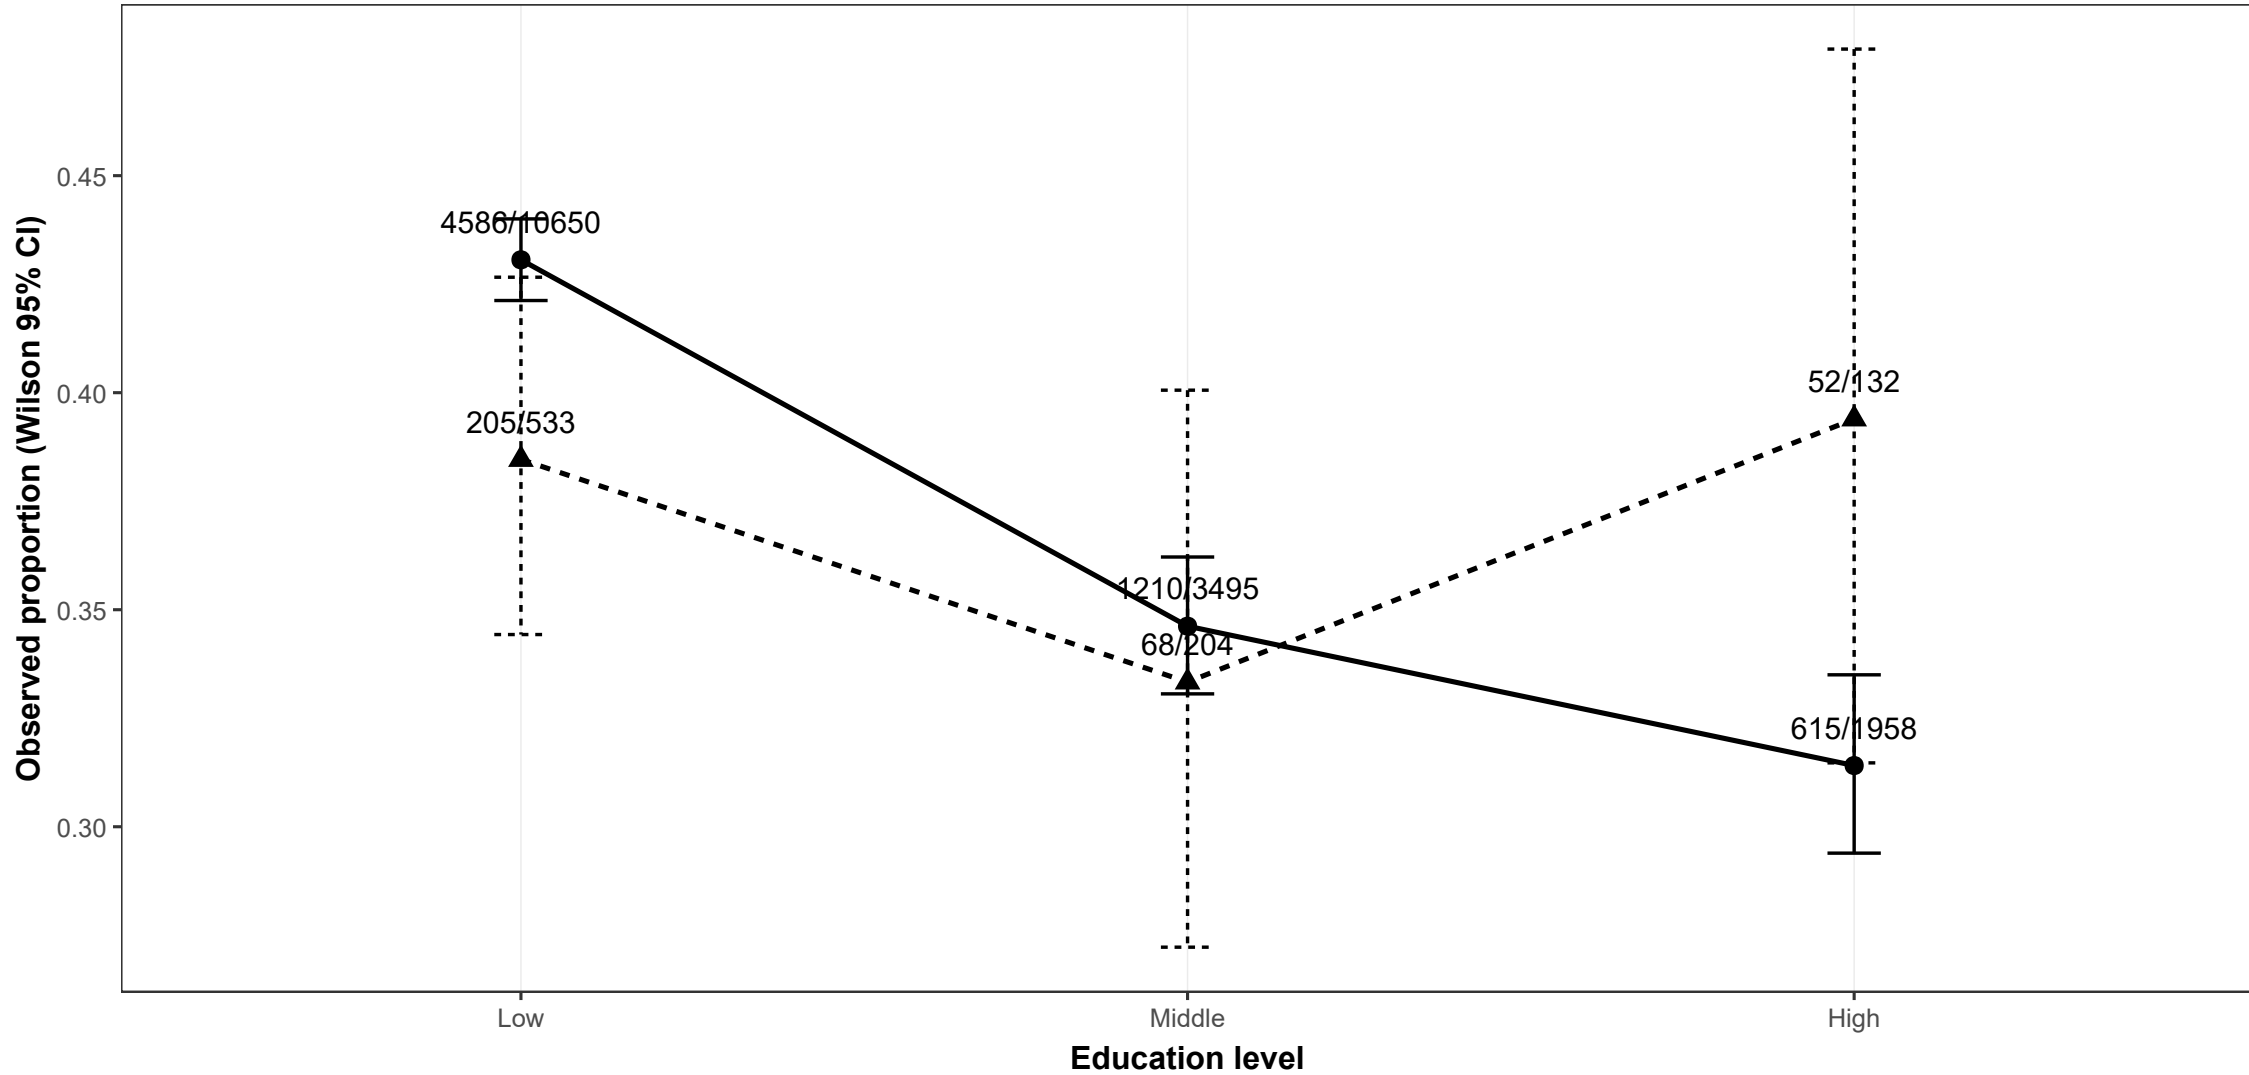

Supplement: Supplementary file 1 [file Fig1_Observed_prevalence_WilsonCI.pdf › Fig1_Observed_prevalence_WilsonCI.pdf]
