# Supplementary material
Source: Research Square preprint supplement (doi:10.21203/rs.3.rs-8765346/v1)
Supplement: Supplementary file 2 [file Fig2_Forest_stratified_OR.pdf › Fig2_Forest_stratified_OR.pdf]

**Figure 2. Stratified association of stroke history with orientation impairment**

Adjusted within education strata

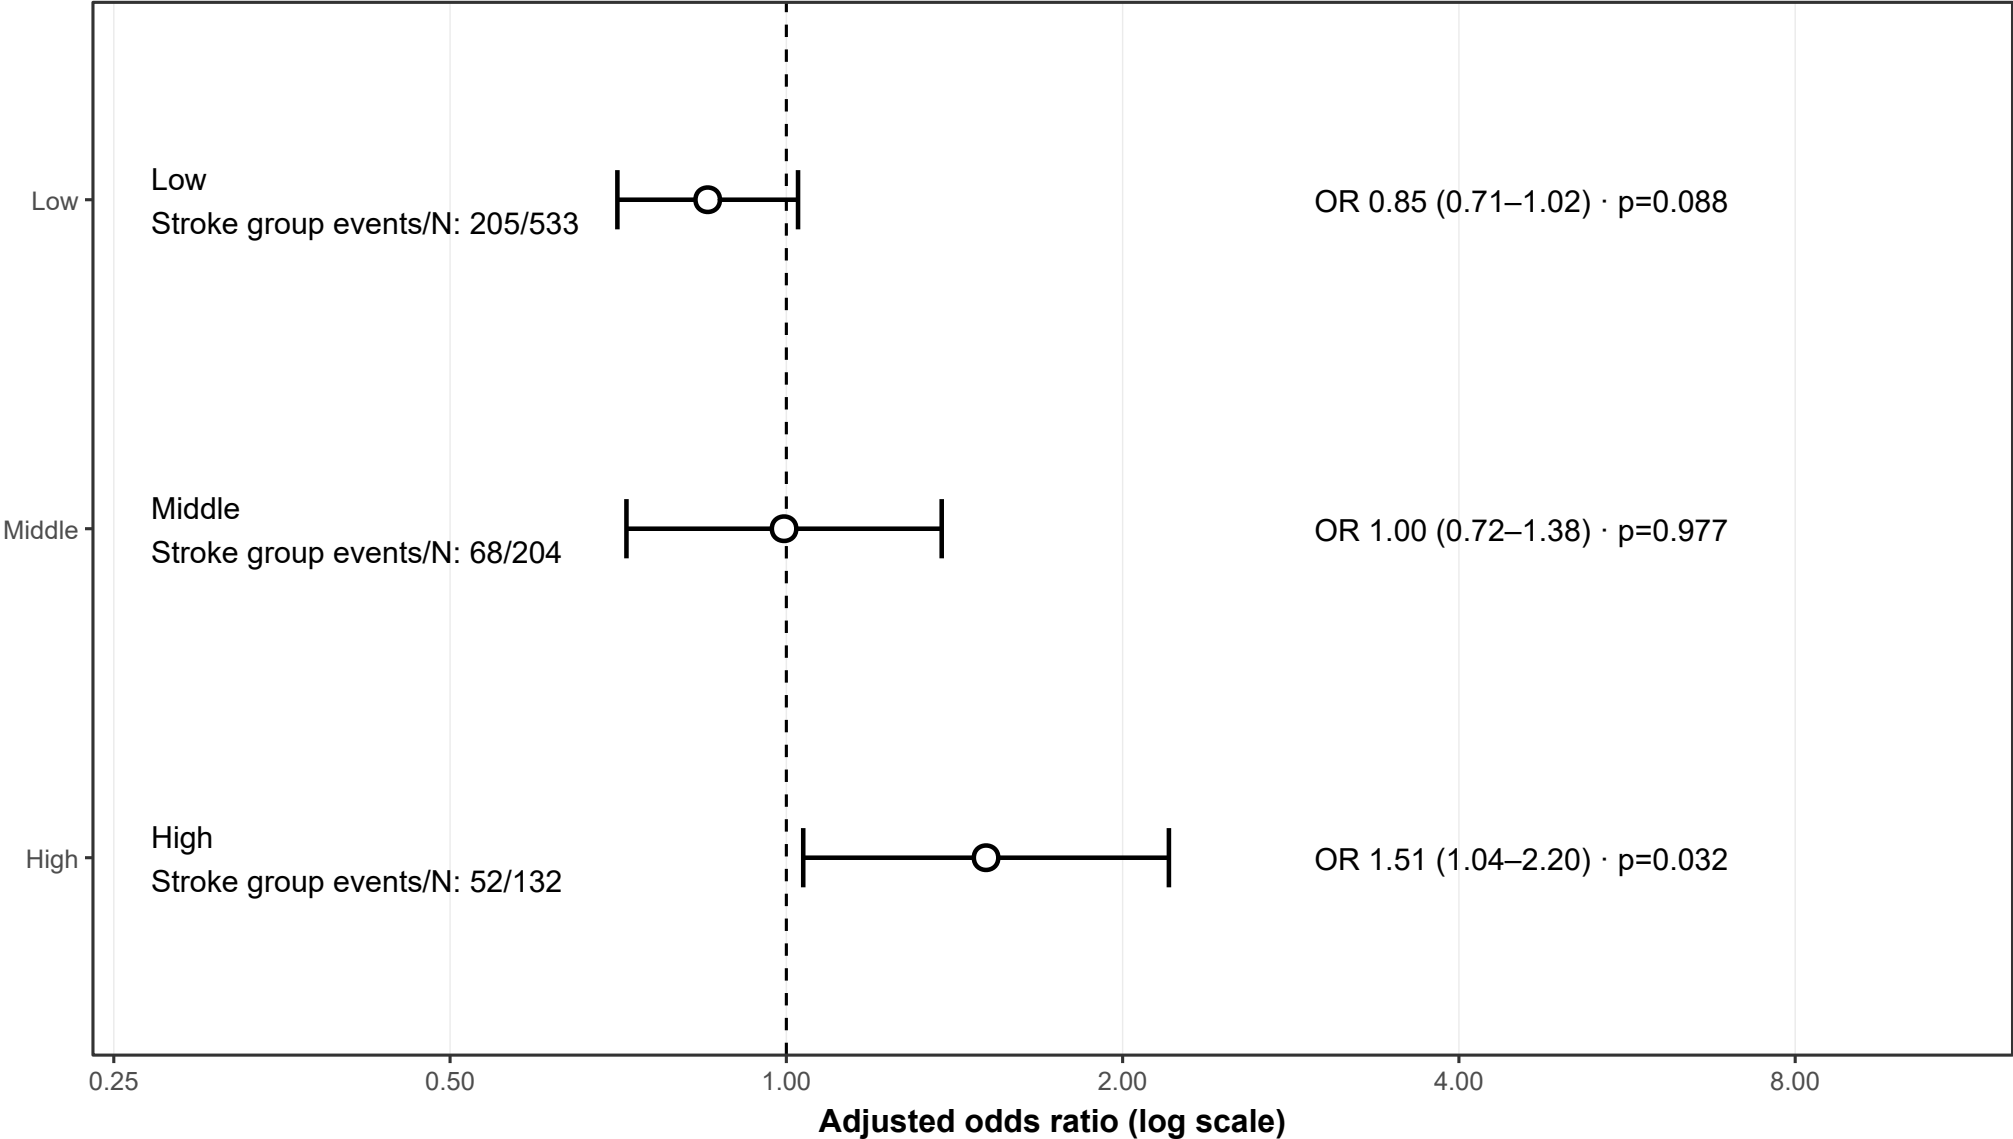

Points: adjusted OR; lines: 95% CI. Left column shows stroke-group events/N.
