# Supplementary material
Source: Research Square preprint supplement (doi:10.21203/rs.3.rs-8765346/v1)

**Figure 3. Interaction plot: stroke × education**

Marginally standardized predicted probabilities with 95% CI · P(interaction) = 0.049

● No stroke ▲ Stroke

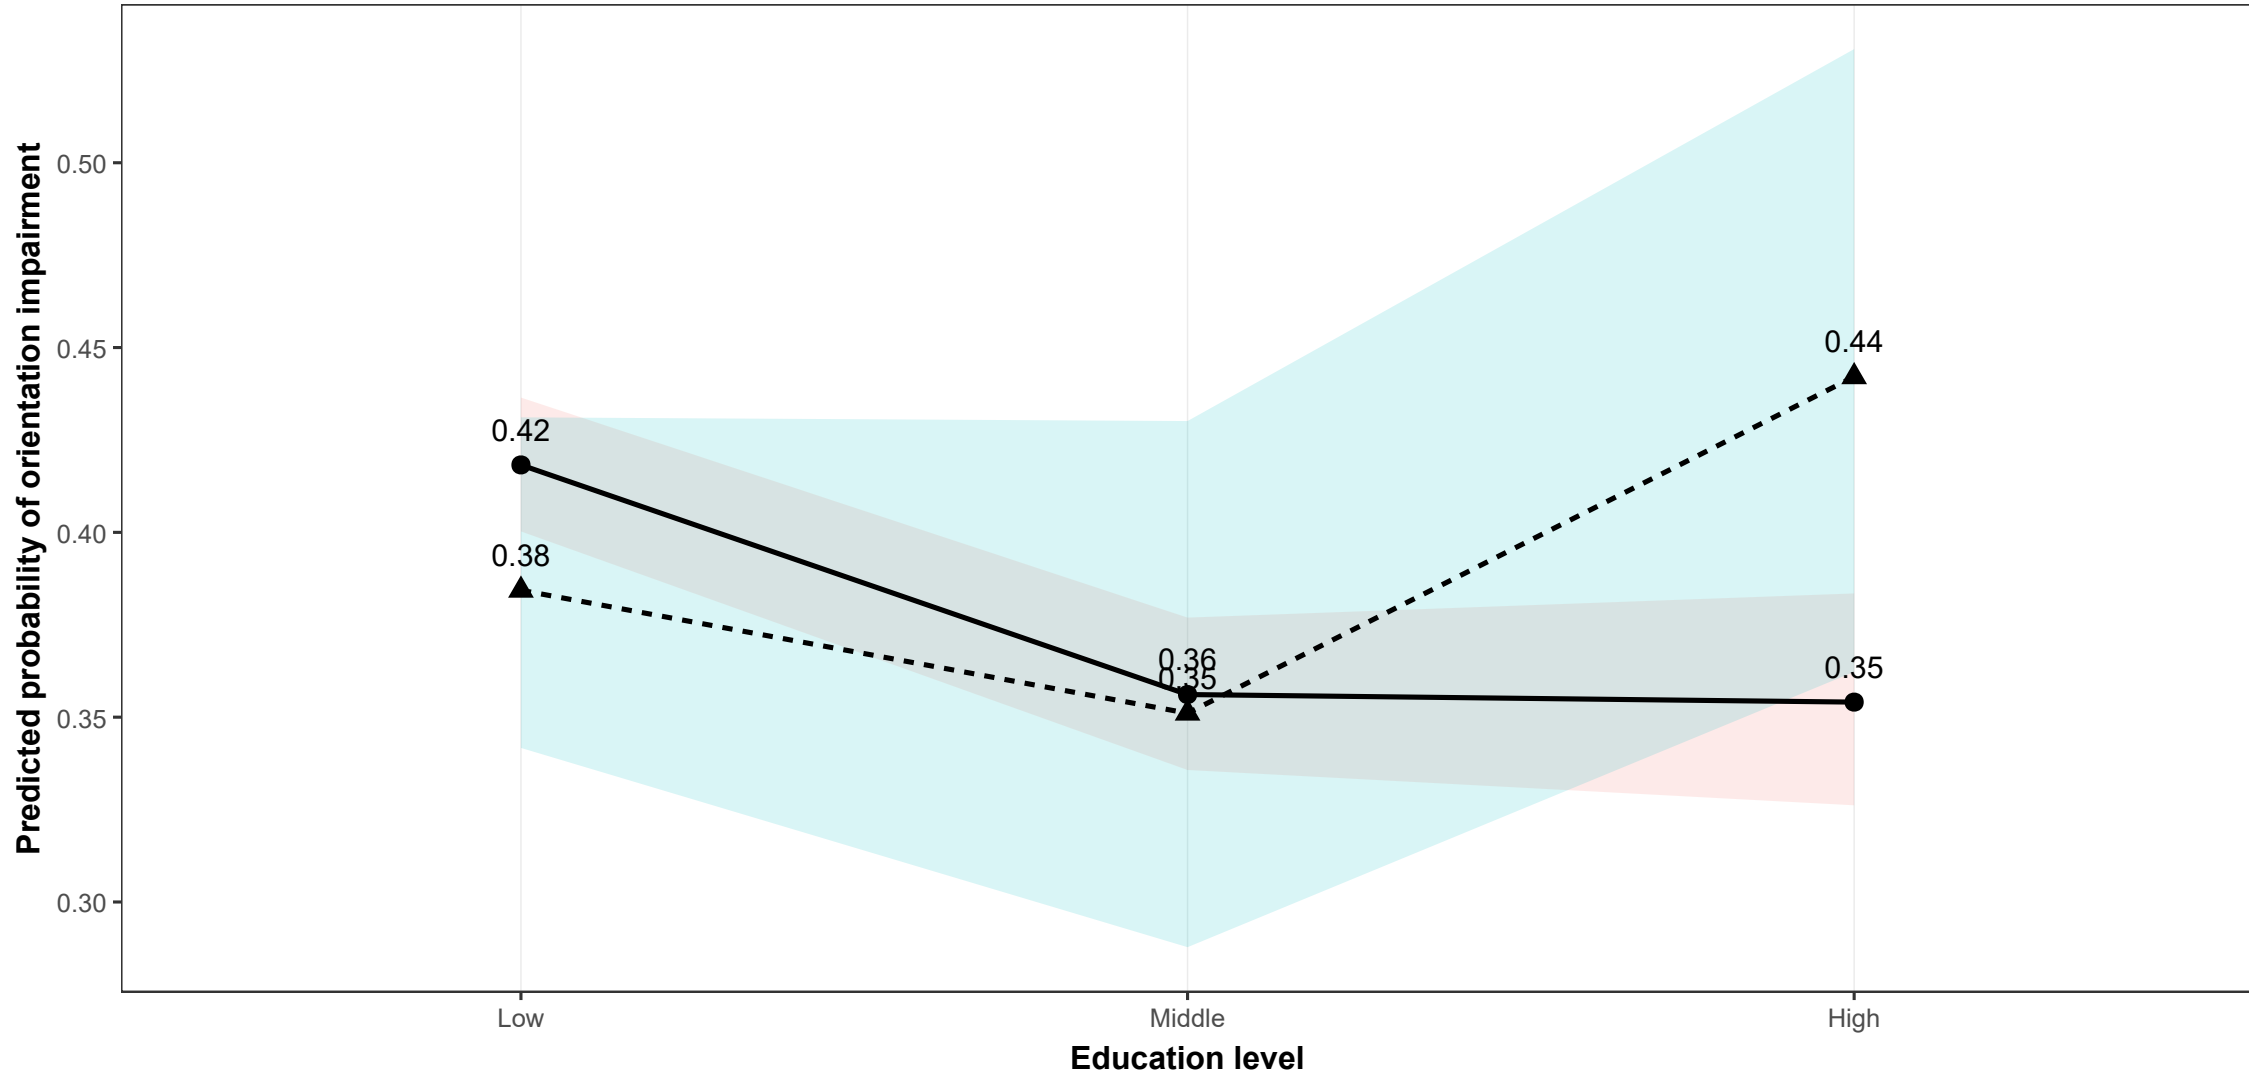

Supplement: Supplementary file 3 [file Fig3_Interaction_predicted_probability_marginal_FAST.pdf › Fig3_Interaction_predicted_probability_marginal_FAST.pdf]
