# Supplementary material
Source: Research Square preprint supplement (doi:10.21203/rs.3.rs-8765346/v1)
Supplement: Supplementary file 4 [file Supplementary_Figure_S1_LOO_Stability.pdf › Supplementary_Figure_S1_LOO_Stability.pdf]

Supplementary Figure 1. Leave-one-out stability analysis (FAST)

Panel A: interaction OR distribution; Panel B: overall interaction LRT p-value

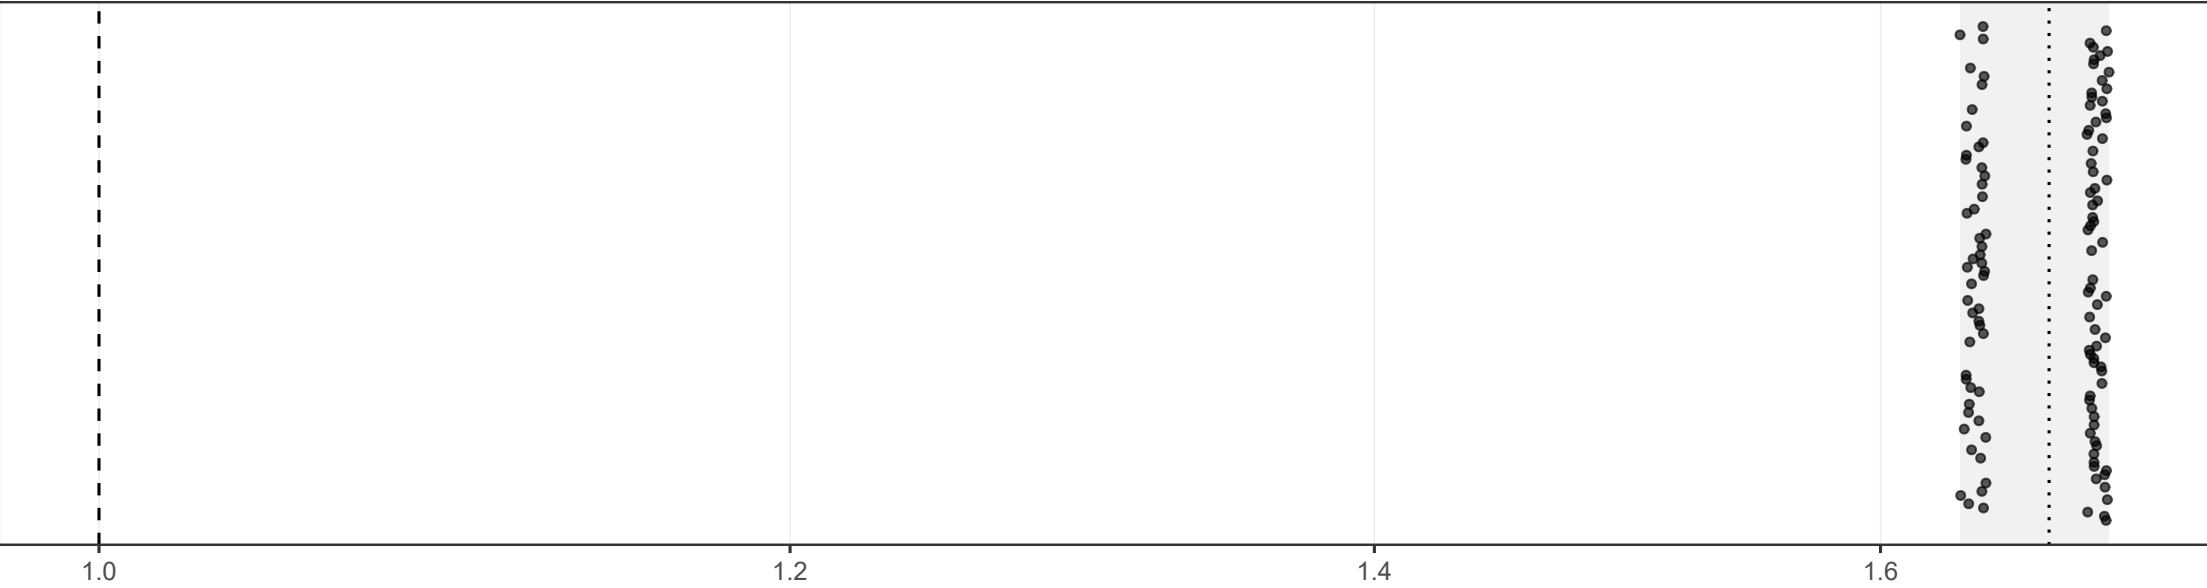

Interaction OR (log scale): Stroke × High education

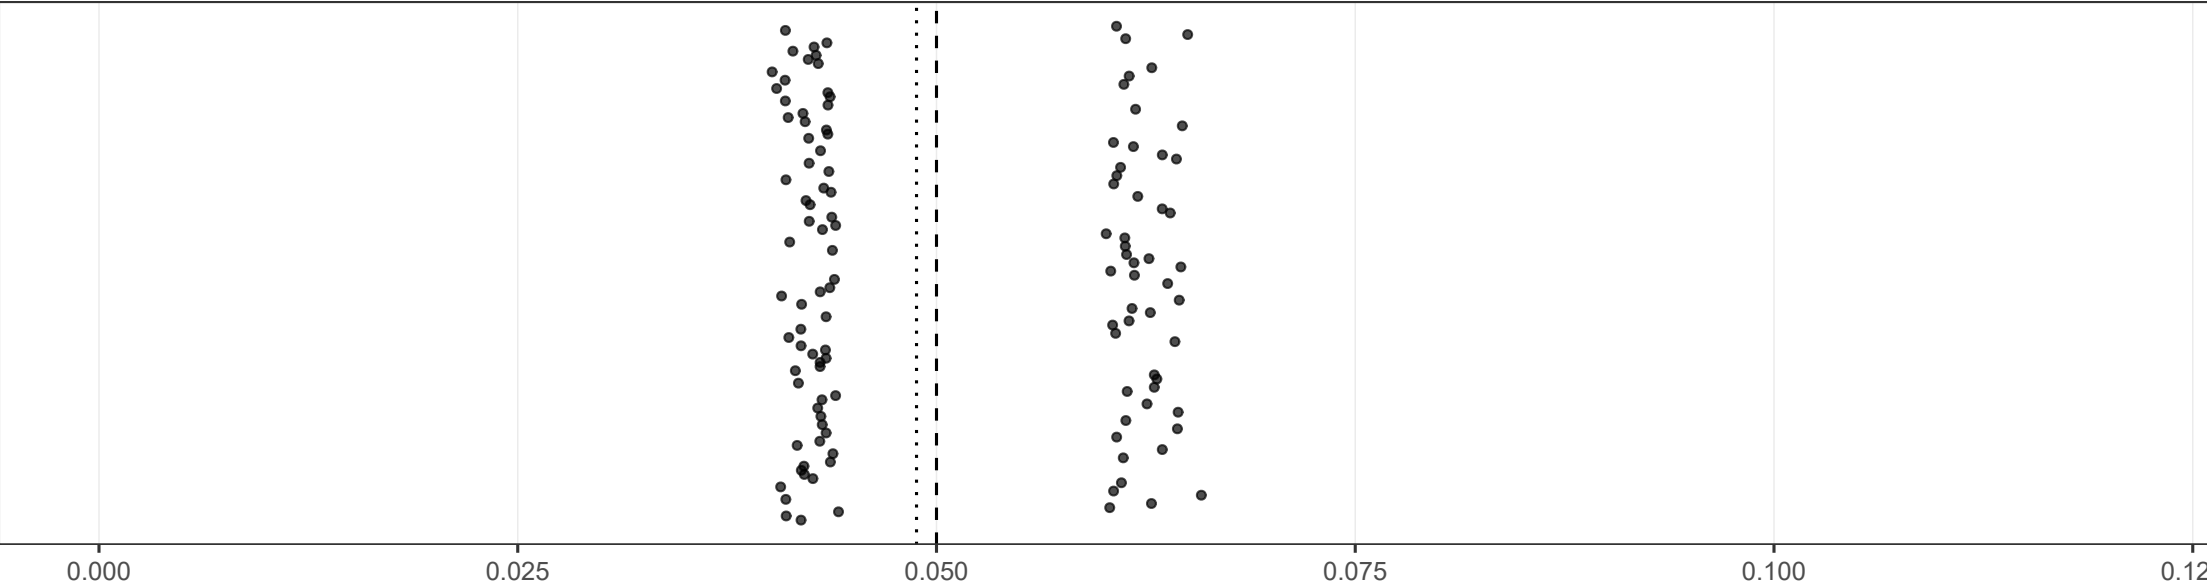

LRT p-value for overall interaction (Stroke × Education)

LOO stability (random subset). Iterations: 120 of 132 in (High education & Stroke=1). Baseline: OR=1.673, LRT p=0.049. LOO OR range: 1.634–1.699; LRT p range: 0.041–0.065.
