# Supplementary material
Source: Research Square preprint supplement (doi:10.21203/rs.3.rs-8765346/v1)

**Supplementary Figure 2. Interaction plot in participants aged  $\geq 65$  years**

Marginally standardized predicted probabilities (95% CI) ·  $P(\text{interaction}) = 0.289$

● No stroke ▲ Stroke

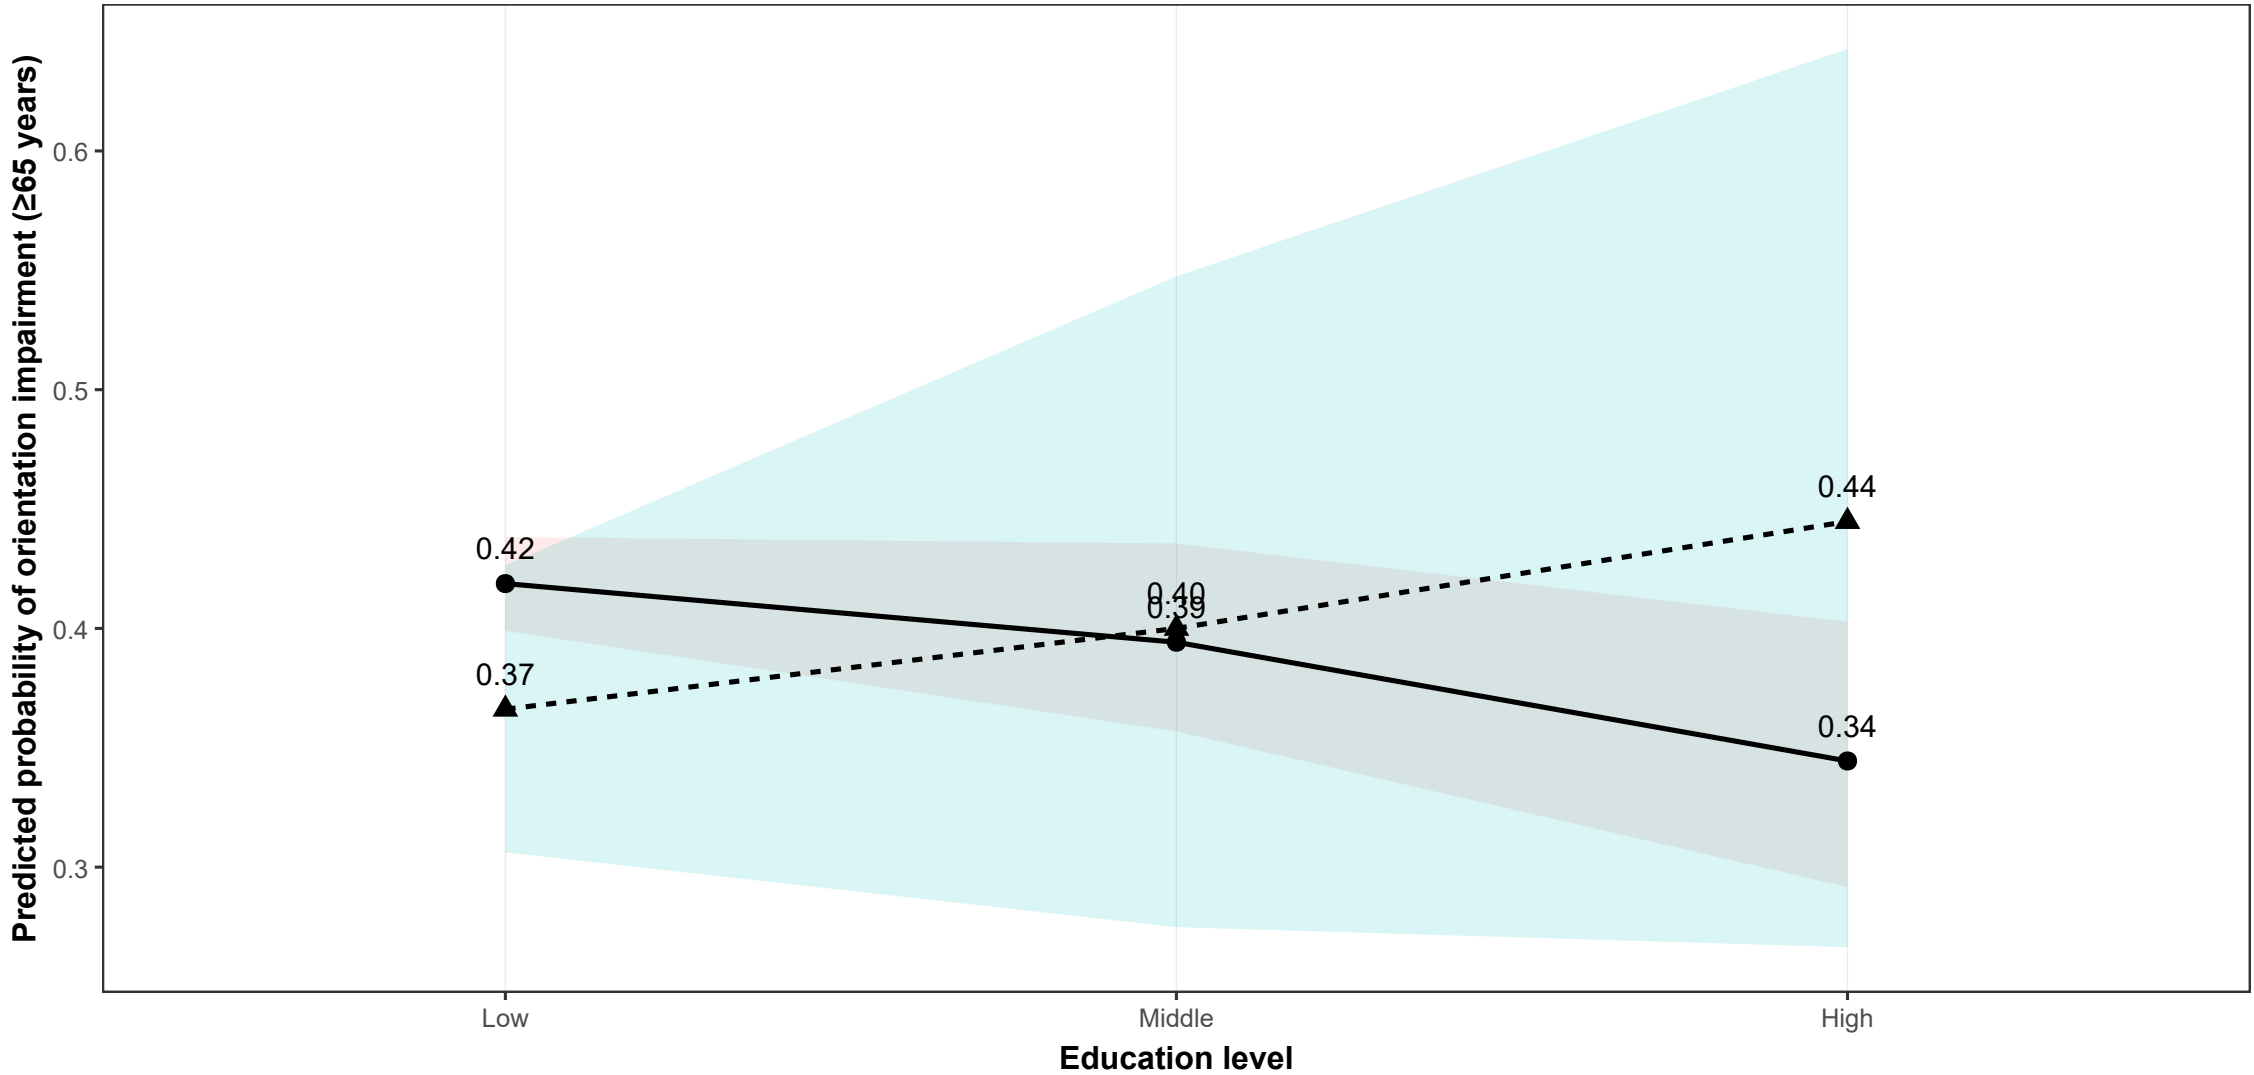

Supplement: Supplementary file 5 [file Supplementary_Figure_S2_PredictedProb_Age65.pdf › Supplementary_Figure_S2_PredictedProb_Age65.pdf]
