# Supplementary material
Source: Research Square preprint supplement (doi:10.21203/rs.3.rs-8765346/v1)
Supplement: Supplementary file 6 [file Supplementary_Table_S1_SensitivityMatrix_UPDATED.pdf › Supplementary_Table_S1_SensitivityMatrix_UPDATED.pdf]

## Supplementary Table S1. Sensitivity analysis matrix for the stroke × education interaction

Rows summarize prespecified sensitivity analyses. Columns report the interaction test p-value, the direction of the stroke×high-education interaction (relative to low education), and an overall qualitative conclusion. P-values are formatted to three decimals.

| Analysis                 | Interaction p      | High-group direction                                               | Conclusion                                                       |
|--------------------------|--------------------|--------------------------------------------------------------------|------------------------------------------------------------------|
| Threshold (≤2)           | 0.612 (LRT)        | High interaction OR 1.13 (0.65–1.96)                               | Attenuated (interaction NS), direction consistent                |
| Threshold (≤3) [Primary] | 0.049 (LRT)        | High interaction OR 1.67 (1.11–2.52)                               | Consistent (primary evidence)                                    |
| Threshold (≤4)           | 0.398 (LRT)        | High interaction OR 1.33 (0.87–2.03)                               | Attenuated (interaction NS), direction consistent                |
| Complete-case            | 0.015* (Wald)      | High interaction OR 2.85 (1.23–6.64)                               | Consistent (direction and magnitude support effect modification) |
| Multiple imputation (MI) | 0.012* (Wald)      | High interaction OR 1.68 (1.12–2.53)                               | Consistent (direction preserved; interaction term significant)   |
| Modified Poisson (RR)    | 0.154 (LRT)        | High interaction RR 1.38 (1.07–1.77)                               | Attenuated (overall interaction NS), direction consistent        |
| Age ≥65 subgroup         | 0.289 (LRT)        | High: RD 0.102 (-0.085–0.305); predicted-probability plot in FigS2 | Attenuated (interaction NS), direction broadly consistent        |
| Ordinal logit (POLR)     | 0.182 (LRT)        | High interaction OR 1.397 (0.962–2.028)                            | Attenuated (trend only), direction consistent                    |
| Quasi-Poisson errors     | 0.249 (joint Wald) | High interaction RR 1.197 (0.969–1.480)                            | Attenuated (trend only), direction consistent                    |
| Negative binomial errors | 0.223 (LRT)        | High interaction RR 1.199 (0.969–1.485)                            | Attenuated (trend only), direction consistent                    |

Notes: Interaction p refers to the overall stroke×education test (2-df LRT) unless marked with \* (then it refers to the Wald p-value for the stroke×High interaction term because an overall LRT was not exported). High-group direction is summarized by the stroke×High interaction estimate (>1 indicates a stronger stroke association in the High education group). Abbreviations: MI, multiple imputation; RR, risk ratio; QP, quasi-Poisson; NB, negative binomial; RD, risk difference.
